# Supplementary material
Source: PubMed Central journal article supplement (PMC4287116)
Supplement: Supp_Table3.pdf [file Supp_Table3.pdf]

SUPPLEMENTARY TABLE S3. PCR PROFILES AND ELISA REACTIVITIES OF TESTED SERA IN A PANEL OF FEBRILE AGENT ASSAYS

| Patient ID | ReLASV Ag | ELISA |          |     |      |     |        |     |      |     |       |     |     |     |        |     | Status | Outcome  |       |
|------------|-----------|-------|----------|-----|------|-----|--------|-----|------|-----|-------|-----|-----|-----|--------|-----|--------|----------|-------|
|            |           | PCR   |          |     |      |     | ReLASV |     | DENV |     | CHIKV |     | WNV |     | Typhus |     |        |          | Lepto |
|            |           | LASV  | P. falc. | WNV | Filo | IgM | IgG    | IgM | IgG  | IgM | IgG   | IgM | IgG | IgM | IgG    | IgM |        |          | IgG   |
| 1860       | —         | —     | —        | —   | —    | ind | —      | pos | —    | —   | pos   | —   | pos | —   | —      | —   | NL PE  | Alive    |       |
| 1892       | —         | —     | nd       | nd  | nd   | pos | pos    | —   | pos  | —   | pos   | —   | pos | —   | pos    | pos | NLPE   | Alive    |       |
| 1951       | pos       | —     | —        | —   | —    | —   | —      | pos | —    | —   | —     | —   | —   | —   | pos    | pos | FUO    | Alive    |       |
| 1959       | pos       | nd    | nd       | nd  | nd   | pos | —      | pos | pos  | —   | —     | pos | pos | —   | —      | —   | LF     | Alive    |       |
| 1961       | —         | —     | nd       | nd  | nd   | pos | —      | —   | —    | pos | pos   | —   | pos | pos | —      | —   | FUO    | Alive    |       |
| 1977       | —         | —     | pos      | pos | —    | pos | pos    | pos | —    | —   | —     | —   | —   | nd  | nd     | pos | NL PE  | Alive    |       |
| 2002       | —         | —     | nd       | nd  | nd   | —   | pos    | —   | —    | —   | —     | —   | —   | —   | —      | —   | FUO    | Alive    |       |
| 2008       | —         | —     | pos      | —   | —    | pos | pos    | —   | —    | —   | —     | nd  | nd  | nd  | nd     | —   | NL PE  | Alive    |       |
| 2028       | —         | —     | —        | pos | —    | —   | —      | pos | —    | —   | —     | —   | pos | —   | —      | pos | NL PE  | Deceased |       |
| 2030       | —         | —     | —        | —   | —    | —   | —      | —   | —    | —   | pos   | —   | —   | —   | —      | —   | FUO    | Alive    |       |
| 2034       | —         | —     | nd       | nd  | nd   | pos | pos    | —   | —    | —   | —     | —   | —   | —   | —      | —   | NLPE   | Alive    |       |
| 2036       | —         | —     | nd       | nd  | nd   | —   | pos    | pos | —    | pos | —     | —   | —   | —   | —      | —   | NLPE   | Alive    |       |
| 2037       | —         | pos   | pos      | —   | —    | —   | —      | pos | —    | —   | pos   | pos | —   | pos | —      | —   | LF     | Deceased |       |
| 2056       | —         | —     | pos      | —   | —    | pos | pos    | —   | —    | —   | pos   | pos | —   | pos | —      | —   | NLPE   | Alive    |       |
| 2057       | —         | —     | pos      | —   | —    | —   | —      | pos | —    | —   | —     | —   | —   | —   | —      | —   | NLPE   | Deceased |       |
| 2058       | —         | —     | pos      | —   | —    | —   | —      | —   | pos  | pos | —     | —   | —   | —   | —      | pos | FUO    | Alive    |       |
| 2063       | —         | —     | pos      | —   | —    | pos | pos    | —   | pos  | —   | —     | nd  | nd  | nd  | nd     | pos | FUO    | Deceased |       |
| 2067       | pos       | pos   | pos      | —   | —    | —   | —      | —   | pos  | —   | —     | pos | pos | —   | pos    | —   | LF     | Alive    |       |
| 2069       | —         | —     | pos      | —   | —    | —   | —      | pos | —    | —   | —     | —   | —   | pos | —      | —   | NL PE  | Alive    |       |
| 2070       | —         | —     | pos      | —   | —    | pos | —      | —   | pos  | pos | —     | nd  | nd  | nd  | nd     | —   | NL PE  | Alive    |       |
| 2073       | —         | —     | pos      | pos | —    | pos | —      | pos | —    | —   | —     | —   | —   | —   | —      | —   | FUO    | Alive    |       |
| 2075       | —         | pos   | pos      | —   | —    | —   | —      | —   | pos  | pos | —     | —   | pos | —   | —      | —   | LF     | Alive    |       |
| 2080       | —         | —     | pos      | pos | —    | —   | —      | —   | pos  | —   | —     | —   | —   | —   | —      | pos | NL PE  | Alive    |       |
| 2087       | —         | —     | pos      | —   | —    | —   | —      | —   | —    | —   | —     | —   | —   | pos | —      | —   | FUO    | Alive    |       |
| 2094       | —         | —     | nd       | nd  | nd   | —   | pos    | pos | —    | —   | pos   | —   | —   | pos | pos    | —   | NLPE   | Alive    |       |
| 2120       | —         | —     | nd       | nd  | nd   | —   | pos    | —   | —    | pos | —     | —   | pos | —   | —      | —   | NLPE   | Alive    |       |
| 2121       | —         | —     | nd       | nd  | nd   | ind | —      | —   | pos  | —   | —     | pos | pos | —   | —      | —   | FUO    | Alive    |       |
| 2126       | —         | —     | pos      | —   | —    | —   | pos    | —   | pos  | pos | —     | pos | pos | —   | pos    | pos | NL PE  | Alive    |       |
| 2134       | —         | nd    | pos      | nd  | —    | —   | —      | —   | pos  | —   | pos   | pos | pos | —   | —      | pos | FUO    | Alive    |       |
| 2136       | —         | nd    | nd       | nd  | nd   | —   | pos    | pos | pos  | —   | —     | —   | pos | —   | —      | pos | FUO    | Alive    |       |
| 2141       | pos       | pos   | nd       | nd  | nd   | pos | —      | —   | pos  | pos | —     | —   | —   | —   | —      | pos | LF     | Deceased |       |
| 2143       | —         | —     | pos      | pos | —    | —   | —      | —   | pos  | —   | —     | —   | pos | —   | —      | —   | FUO    | Alive    |       |
| 2145       | —         | —     | pos      | —   | —    | —   | —      | —   | pos  | pos | pos   | —   | pos | —   | —      | pos | FUO    | Deceased |       |
| 2146       | —         | —     | pos      | —   | —    | —   | —      | —   | pos  | —   | —     | —   | pos | pos | pos    | —   | NL PE  | Deceased |       |
| 2147       | pos       | nd    | nd       | nd  | nd   | pos | —      | —   | —    | —   | —     | —   | —   | —   | —      | —   | LF     | Deceased |       |
| 2165       | pos       | pos   | nd       | nd  | nd   | pos | —      | pos | —    | —   | pos   | nd  | nd  | —   | —      | —   | LF     | Deceased |       |
| 2166       | —         | —     | —        | —   | —    | —   | pos    | —   | pos  | pos | pos   | —   | pos | —   | —      | pos | NLPE   | Alive    |       |
| 2168       | pos       | nd    | nd       | nd  | nd   | —   | —      | —   | —    | —   | —     | —   | —   | —   | —      | —   | LF     | Deceased |       |
| 2182       | —         | pos   | pos      | —   | —    | ind | —      | —   | pos  | pos | —     | pos | pos | —   | —      | —   | LF     | Alive    |       |
| 2183       | —         | nd    | nd       | nd  | nd   | —   | —      | —   | —    | —   | —     | —   | pos | —   | —      | —   | FUO    | Deceased |       |
| 2184       | pos       | —     | pos      | pos | —    | pos | —      | —   | —    | pos | —     | nd  | nd  | nd  | —      | —   | NLPE   | Deceased |       |
| 2188       | —         | —     | —        | —   | —    | —   | —      | —   | pos  | pos | —     | —   | pos | —   | pos    | pos | NL PE  | Alive    |       |
| 2190       | pos       | pos   | nd       | nd  | nd   | ind | —      | —   | —    | —   | —     | —   | —   | —   | —      | —   | LF     | Deceased |       |
| 2197       | pos       | nd    | nd       | nd  | nd   | —   | —      | —   | —    | pos | —     | —   | —   | —   | —      | pos | LF     | Deceased |       |
| 2199       | —         | nd    | nd       | nd  | nd   | pos | pos    | pos | —    | —   | pos   | —   | pos | —   | —      | —   | NLPE   | Alive    |       |
| 2200       | —         | —     | pos      | —   | —    | ind | —      | pos | pos  | —   | pos   | —   | pos | —   | pos    | —   | FUO    | Alive    |       |
| 2204       | —         | nd    | nd       | nd  | nd   | pos | pos    | —   | —    | —   | —     | nd  | nd  | nd  | nd     | —   | NLPE   | Alive    |       |
| 2205       | —         | —     | pos      | —   | —    | pos | ind    | —   | pos  | —   | —     | —   | —   | —   | pos    | pos | NL PE  | Deceased |       |
| 2210       | —         | nd    | nd       | nd  | nd   | pos | pos    | —   | pos  | pos | —     | nd  | nd  | nd  | nd     | pos | NLPE   | Alive    |       |
| 2213       | —         | —     | pos      | —   | —    | —   | —      | —   | pos  | pos | —     | pos | pos | —   | —      | —   | FUO    | Alive    |       |
| 2216       | pos       | nd    | nd       | nd  | nd   | —   | —      | —   | —    | —   | —     | pos | —   | nd  | nd     | nd  | LF     | Deceased |       |
| 2217       | —         | —     | pos      | —   | —    | pos | —      | pos | —    | —   | pos   | —   | pos | —   | —      | pos | NL PE  | Alive    |       |
| 2218       | —         | nd    | nd       | nd  | nd   | pos | —      | —   | pos  | —   | —     | pos | pos | pos | —      | —   | NL PE  | Alive    |       |
| 2219       | —         | pos   | pos      | —   | —    | pos | pos    | —   | —    | pos | —     | pos | pos | pos | —      | —   | LF     | Alive    |       |
| 2222       | pos       | nd    | nd       | nd  | nd   | pos | —      | —   | —    | —   | —     | —   | pos | pos | —      | —   | LF     | Deceased |       |
| 2229       | pos       | nd    | nd       | nd  | nd   | —   | —      | —   | —    | —   | pos   | —   | —   | pos | —      | —   | LF     | Alive    |       |
| 2230       | pos       | nd    | nd       | nd  | nd   | pos | —      | —   | —    | pos | —     | pos | —   | —   | —      | pos | LF     | Deceased |       |
| 2231       | —         | nd    | nd       | nd  | nd   | pos | pos    | —   | pos  | —   | —     | pos | —   | —   | —      | —   | NLPE   | Alive    |       |
| 2232       | —         | pos   | pos      | pos | —    | —   | —      | —   | pos  | pos | —     | —   | pos | —   | —      | pos | LF     | Alive    |       |
| 2236       | —         | pos   | pos      | —   | —    | —   | —      | —   | pos  | pos | pos   | —   | pos | —   | —      | pos | LF     | Alive    |       |
| 2244       | —         | —     | pos      | —   | —    | pos | —      | —   | —    | pos | —     | —   | —   | —   | —      | pos | NL PE  | Deceased |       |

(continued)

SUPPLEMENTARY TABLE S3. (CONTINUED)

| Patient ID | ReLASV Ag | ELISA |          |     |      |        |     |      |     |       |     |     |     |        |     |       | Status | Outcome  |
|------------|-----------|-------|----------|-----|------|--------|-----|------|-----|-------|-----|-----|-----|--------|-----|-------|--------|----------|
|            |           | PCR   |          |     |      | ReLASV |     | DENV |     | CHIKV |     | WNV |     | Typhus |     | Lepto |        |          |
|            |           | LASV  | P. falc. | WNV | Filo | IgM    | IgG | IgM  | IgG | IgM   | IgG | IgM | IgG | IgM    | IgG | IgM   |        |          |
| 2252       | —         | nd    | nd       | nd  | nd   | pos    | pos | pos  | —   | pos   | —   | —   | —   | pos    | —   | pos   | NLPE   | Alive    |
| 2253       | —         | nd    | nd       | nd  | nd   | —      | —   | —    | pos | —     | pos | —   | pos | —      | —   | —     | FUO    | Alive    |
| 2255       | —         | —     | pos      | —   | —    | —      | pos | pos  | pos | —     | pos | pos | pos | pos    | —   | pos   | NL PE  | Alive    |
| 2256       | —         | —     | —        | —   | —    | —      | pos | —    | pos | pos   | —   | —   | pos | —      | pos | —     | NL PE  | Alive    |
| 2257       | —         | pos   | pos      | —   | —    | pos    | —   | —    | —   | —     | —   | —   | —   | pos    | —   | —     | LF     | Alive    |
| 2259       | pos       | nd    | nd       | nd  | nd   | pos    | pos | —    | —   | —     | —   | nd  | nd  | nd     | nd  | —     | LF     | Deceased |
| 2263       | pos       | nd    | nd       | nd  | nd   | —      | —   | —    | —   | —     | pos | —   | —   | —      | —   | pos   | LF     | Deceased |
| 2264       | —         | pos   | pos      | —   | —    | pos    | pos | —    | pos | pos   | —   | —   | pos | pos    | —   | —     | LF     | Alive    |
| 2266       | —         | —     | —        | —   | pos  | pos    | —   | —    | pos | pos   | —   | pos | pos | pos    | —   | pos   | NL PE  | Alive    |
| 2267       | pos       | nd    | nd       | nd  | nd   | pos    | —   | pos  | pos | —     | —   | —   | pos | pos    | —   | —     | LF     | Alive    |
| 2273       | pos       | nd    | nd       | nd  | nd   | pos    | —   | —    | —   | —     | pos | —   | —   | —      | —   | —     | LF     | Alive    |
| 2274       | —         | nd    | nd       | nd  | nd   | pos    | —   | —    | pos | pos   | —   | —   | pos | —      | —   | pos   | FUO    | Alive    |
| 2280       | pos       | nd    | nd       | nd  | nd   | —      | —   | —    | pos | —     | —   | pos | —   | pos    | pos | pos   | FUO    | Alive    |
| 2281       | —         | —     | pos      | —   | —    | pos    | —   | —    | —   | —     | —   | nd  | nd  | nd     | nd  | —     | NL PE  | Alive    |
| 2283       | pos       | nd    | nd       | nd  | nd   | —      | —   | —    | —   | —     | —   | —   | —   | pos    | pos | —     | LF     | Alive    |
| 2285       | pos       | nd    | nd       | nd  | nd   | pos    | —   | —    | pos | pos   | —   | nd  | nd  | nd     | nd  | pos   | LF     | Alive    |
